# Supplementary material for: Rev1 promotes replication through UV lesions in conjunction with DNA polymerases η, ι, and κ but not DNA polymerase ζ
Source: PubMed Central journal article supplement — Genes Dev. 2015 Dec 15;29(24):2588–602. doi: 10.1101/gad.272229.115 (PMC4699387; doi:10.1101/gad.272229.115), 2015-12-15
Supplement: supp_29.24.2588_Supp_Material.pdf [file supp_29.24.2588_Supp_Material.pdf]

**Supplemental Material:**

**Rev1 promotes replication through UV lesions in conjunction with DNA polymerases  $\eta$ ,  $\iota$ , and  $\kappa$ , but not with DNA polymerase  $\zeta$**

**Jung-Hoon Yoon, Jeseong Park, Juan Conde, Maki Wakamiya, Louise Prakash\*,  
and Satya Prakash**

Department of Biochemistry and Molecular Biology, university of Texas Medical Branch,  
Galveston, TX 77555-1061, USA

\*Corresponding author: Louise Prakash, [l.prakash@utmb.edu](mailto:l.prakash@utmb.edu)

**Supplemental Table S1.** Effects of siRNA knockdown of Pol $\eta$  or Rev1 on TLS opposite a *cis-syn* TT dimer carried on the leading strand DNA template in wild type human fibroblasts and complementation of Pol $\eta$  or Rev1 depleted cells by vector expressing siRNA resistant (siR) form of Pol $\eta$  or Rev1

| siRNA      | Vector expressing      | # kan <sup>+</sup> colonies | # blue colonies among kan <sup>+</sup> | TLS (%) |
|------------|------------------------|-----------------------------|----------------------------------------|---------|
| NC         | -                      | 440                         | 110                                    | 25.0    |
| Pol $\eta$ | -                      | 198                         | 22                                     | 11.1    |
| Pol $\eta$ | Flag-WT-Pol $\eta$     | 284                         | 33                                     | 11.6    |
| Pol $\eta$ | Flag-WT-siR-Pol $\eta$ | 302                         | 77                                     | 25.5    |
| Rev1       | -                      | 258                         | 20                                     | 7.8     |
| Rev1       | Flag-WT-Rev1           | 230                         | 17                                     | 7.4     |
| Rev1       | Flag-WT-siR-Rev1       | 246                         | 68                                     | 27.6    |

**Supplemental Table S2.** Effects of siRNA knockdown of Rev1 on mutation frequencies and nucleotides inserted opposite a *cis-syn* TT dimer carried on the leading or lagging strand DNA template in NER defective XPA human fibroblasts

| <i>cis-syn</i> TT dimer | # of <i>Kan</i> <sup>+</sup> blue colonies sequenced <sup>1</sup> | Nucleotide inserted |                       |   |          | Mutation frequency % |
|-------------------------|-------------------------------------------------------------------|---------------------|-----------------------|---|----------|----------------------|
|                         |                                                                   | A                   | G                     | C | T        |                      |
| <u>Leading strand</u>   |                                                                   |                     |                       |   |          |                      |
| NC siRNA                | 238 (5) <sup>1</sup>                                              | 233                 | 3 (3' T) <sup>2</sup> | - | 2 (5' T) | 2.2                  |
| Rev1 siRNA              | 408 (15)                                                          | 383                 | 6 (5' T)<br>5 (3' T)  | - | 4 (3'T)  | 3.8                  |
| <u>Lagging strand</u>   |                                                                   |                     |                       |   |          |                      |
| NC siRNA                | 285 (9)                                                           | 276                 | 4 (5' T)<br>2 (3' T)  | - | 2 (3' T) | 2.8                  |
| Rev1 siRNA              | 242 (13)                                                          | 229                 | 6 (5' T)<br>3 (3' T)  | - | 4 (3' T) | 5.4                  |

1. Numbers of colonies where TLS occurred by insertion of a nucleotide other than an A opposite the *cis-syn* TT dimer are shown in parenthesis.
2. The site where mutation occurred, 3'T or the 5'T of the *cis-syn* TT dimer is indicated in parenthesis.

**Supplemental Table S3.** Effects of siRNA knockdown of Rev1 on mutation frequencies and nucleotides inserted opposite a (6-4) TT photoproduct carried on the leading or lagging strand DNA template in NER defective XPA human fibroblasts

| (6-4) TT photoproduct | # of <i>Kan</i> <sup>+</sup> blue colonies sequenced <sup>1</sup> | Nucleotide inserted |                                   |   |          |       | Mutation frequency % |
|-----------------------|-------------------------------------------------------------------|---------------------|-----------------------------------|---|----------|-------|----------------------|
|                       |                                                                   | A                   | G                                 | C | T        | Other |                      |
| <u>Leading strand</u> |                                                                   |                     |                                   |   |          |       |                      |
| NC siRNA              | 432 (6) <sup>1</sup>                                              | 426                 | 2 (5' T) <sup>2</sup><br>1 (3' T) | - | 2 (3' T) | 1     | 2.2                  |
| Rev1 siRNA            | 334 (0)                                                           | 334                 | -                                 | - | -        | -     | 0                    |
| <u>Lagging strand</u> |                                                                   |                     |                                   |   |          |       |                      |
| NC siRNA              | 398 (6)                                                           | 392                 | 3 (5' T)<br>1 (3' T)              | - | 1 (3' T) | 1     | 1.6                  |
| Rev1 siRNA            | 320 (0)                                                           | 229                 | -                                 | - | -        | -     | 0                    |

1. Numbers of colonies where TLS occurred by insertion of a nucleotide other than an A opposite the (6-4) TT photoproduct are shown in parenthesis.
2. The site where mutation occurred, 3'T or the 5'T of the (6-4) TT photoproduct is indicated in parenthesis.



**Supplemental Table S4.** UV induced mutation frequencies in the *cII* gene in (BBMEF) mouse cells carrying the pNeo vector which expresses no photolyase; hence, UV induced mutations result from replication through both the CPDs and (6-4) photoproducts in these cells

| siRNA           | UV <sup>1</sup> | PR <sup>2</sup> | Mutation frequency <sup>3</sup><br>(x10 <sup>-5</sup> ) |
|-----------------|-----------------|-----------------|---------------------------------------------------------|
| NC <sup>4</sup> | -               | -               | 18.6 ± 4.2                                              |
| NC              | +               | +               | 52.6 ± 5.2                                              |
| Pol η           | +               | +               | 95.8 ± 6.3                                              |
| Pol κ           | +               | +               | 31.5 ± 5.6                                              |
| Rev3            | +               | +               | 34.1 ± 4.5                                              |
| Rev1            | +               | +               | 69.8 ± 4.2                                              |

1. 5 J/m<sup>2</sup> of UVC (254 nm) light.
2. Photoreactivation with UVA (360nm) light for 3 h.
3. Mutation frequency data were obtained from averages of 7 independent experiments.
4. NC, negative control siRNA.

**Supplemental Table S5.** UV induced mutation frequencies in the *cII* gene in Rev1<sup>+/+</sup>, Rev1<sup>+/-</sup>, and Rev1<sup>-/-</sup> mouse primary embryonic fibroblasts

| Cell line                             | UV <sup>1</sup> | Mutation frequency <sup>2</sup><br>(x10 <sup>-5</sup> ) |
|---------------------------------------|-----------------|---------------------------------------------------------|
| Rev1 <sup>+/+</sup>                   | -               | 4.6 ± 1.2                                               |
| Rev1 <sup>+/-</sup>                   | -               | 5.2 ± 1.4                                               |
| Rev1 <sup>-/-</sup> (#1) <sup>3</sup> | -               | 5.8 ± 1.5                                               |
| Rev1 <sup>+/+</sup>                   | +               | 31.6 ± 2.8                                              |
| Rev1 <sup>+/-</sup>                   | +               | 40.8 ± 3.2                                              |
| Rev1 <sup>-/-</sup> (#1)              | +               | 57.2 ± 3.8                                              |
| Rev1 <sup>-/-</sup> (#2)              | +               | 54.6 ± 2.4                                              |

1. 5 J/m<sup>2</sup> of UVC (254nm) light.
2. Mutation frequencies were determined from the average of 3 independent experiments.
3. Two different Rev1<sup>-/-</sup> primary MEF cell lines (#s 1 and 2) were used for these experiments.

**Supplemental Table S6. Effects of siRNA depletion of Rev1 and Rev3 on the frequency of gap filling opposite the (6-4) TT photoproduct in human fibroblasts**

| siRNA       | No. of Zeo <sup>R</sup> colonies | No. of Amp <sup>R</sup> colonies | Gap-filling opposite (6-4) TT photoproduct<br>% Amp <sup>R</sup> /Zeo <sup>R</sup> |
|-------------|----------------------------------|----------------------------------|------------------------------------------------------------------------------------|
| NC          | 338                              | 75                               | 22.0                                                                               |
| Rev1        | 315                              | 26                               | 8.3                                                                                |
| Rev3        | 311                              | 25                               | 8.0                                                                                |
| Rev1 + Rev3 | 426                              | 34                               | 8.0                                                                                |

**Supplemental Table S7. Effects of siRNA depletion of Pol $\eta$ , Rev1, and Rev3 on the frequency of gap filling opposite the *cis-syn* TT dimer in human fibroblasts**

| siRNA      | No. of Zeo <sup>R</sup> colonies | No. of Amp <sup>R</sup> colonies | Gap-filling opposite <i>cis-syn</i> TT dimer<br>% Amp <sup>R</sup> /Zeo <sup>R</sup> |
|------------|----------------------------------|----------------------------------|--------------------------------------------------------------------------------------|
| NC         | 220                              | 137                              | 62.3                                                                                 |
| Pol $\eta$ | 168                              | 30                               | 17.9                                                                                 |
| Rev1       | 236                              | 142                              | 60.2                                                                                 |
| Rev3       | 208                              | 120                              | 57.6                                                                                 |

**Supplemental Table S8. Mutagenicity of TLS opposite (6-4) TT photoproduct carried in the gapped plasmid in human fibroblasts**

| siRNA | # of <i>Amp</i> <sup>R</sup> colonies sequenced | Nucleotide inserted |                        |   |                      |                | Mutation frequency |
|-------|-------------------------------------------------|---------------------|------------------------|---|----------------------|----------------|--------------------|
|       |                                                 | A                   | G                      | C | T                    | other          |                    |
| NC    | 288 (35) <sup>1</sup>                           | 253                 | 12 (3' T) <sup>2</sup> | 0 | 12 (3' T)<br>5 (5'T) | 6 <sup>3</sup> | 12.1               |

1. Numbers of colonies in parenthesis where TLS incurred a mutational event.
2. The site where mutations occurred, 3'T or the 5'T of the (6-4) TT photoproduct is indicated in parenthesis.
3. These mutational events occurred in bases flanking the TT photoproduct.

## Supplementary Figure Legends

**Figure S1. SV40 plasmid for TLS assays.** The plasmid carries the wild type *Kan<sup>+</sup>* gene on the lesion-containing strand and the *Kan<sup>-</sup>* gene on the other DNA strand. In the *lacZ'* gene, the lesion-containing DNA strand harbors an MfeI restriction site, and it encodes functional  $\beta$ -galactosidase ( $\beta$ -gal), while the opposite strand harbors a SpeI site containing a +1 frameshift, making it non-functional for  $\beta$ -gal. TLS through the *cis-syn* T<sup>T</sup> dimer (CPD) results in the formation of *Kan<sup>+</sup>* blue colonies. Template switch results in continuing replication of the *Kan<sup>+</sup>* strand by using the *lacZ'* strand harboring the SpeI sequence as a template. This process generates colonies that are *Kan<sup>+</sup>* white. Thus, with this assay system, *Kan<sup>+</sup>* blue colonies result from TLS whereas *Kan<sup>+</sup>* white colonies would derive from template switching in NER-defective cells. Mismatch repair has no effect in this plasmid system.

**Figure S2. Efficient siRNA knockdown of Rev1 in human and mouse fibroblasts.** (A) Western blot analyses of siRNA knockdown of TLS Pols in human fibroblasts.  $\beta$ -tubulin was used as the loading control. (B) Normal human fibroblasts (MRC5) expressing 3x-Flag-wild type or 3x-Flag-siRNA resistant form (SiR) of Pol $\eta$  or Rev1 were treated with siRNA for 48 h. The efficiency of siRNA depletion was determined by Western blot with anti-Flag antibody (Sigma).  $\beta$ -tubulin was used as the loading control. (C) Western blot analysis of siRNA knock down of TLS Pols in mouse embryonic fibroblasts.  $\beta$ -tubulin was used as the loading control.

**Figure S3. Growth retardation of Rev1<sup>-/-</sup> mice and UV sensitivity of Rev1<sup>-/-</sup> MEFs.** (A) One month old wild type (right) and Rev1<sup>-/-</sup> mice (left) are shown. Rev1<sup>-/-</sup> mice display a growth retardation phenotype. (B) The integration site of the gene trapping vector in the first intron of

WT Rev1 and the resulting mutant Rev1 allele are shown. Genotype analysis of Rev1<sup>+/+</sup> (WT), Rev1<sup>+/-</sup>, and Rev1<sup>-/-</sup> mice by PCR amplification with the primers IST10468C11F and LTR-rev. No PCR products are detected in wild type mouse tail genomic DNA. M, size marker; dH<sub>2</sub>O, water control for PCR. Loss of Rev1 protein in Rev1<sup>-/-</sup> MEFs was verified by Western blot analysis using mouse Rev1 antibodies. (C) UV survival of Rev1<sup>+/+</sup>(WT), Rev1<sup>+/-</sup>, and Rev1<sup>-/-</sup> mouse primary embryonic fibroblasts irradiated in PBS buffer with 10 J/m<sup>2</sup> of UVC light. Cells were incubated for an additional 48 h after UV irradiation. UV survival was determined by the MTT assay. The data represent the mean and standard deviation of results of three independent experiments.

**Figure S4. Requirement of Rev1 for the accumulation of Y-family Pols into replication foci in UV damaged MEFs.** (A) SV40-transformed Rev1<sup>+/+</sup> MEFs were transfected with GFP-Pol $\eta$  or GFP-Pol $\kappa$ . After 20 h, cells were treated with 20 J/m<sup>2</sup> UVC. Representative images of GFP-Pol $\eta$  and GFP-Pol $\kappa$  foci are shown on the left and quantification of cells containing these foci is shown on the right. Error bars represent the standard deviation of three independent experiments. (B) SV40-transformed Rev1<sup>-/-</sup> MEFs were transfected with GFP-Pol $\eta$  or GFP-Pol $\kappa$ . Reduction of GFP-Pol $\eta$  and GFP-Pol $\kappa$  foci are shown on the left and quantification of cells containing these foci is shown on the right. Error bars represent the standard deviation of three independent experiments. (C) Rev7 foci formation in UV treated primary Rev1<sup>+/+</sup> or Rev1<sup>-/-</sup> MEFs. UV induced Rev7 foci in the primary Rev1<sup>+/+</sup> or Rev1<sup>-/-</sup> MEFs are shown on the left and quantification of mouse Rev7 foci is shown on the right. Error bars represent the standard deviation of three independent experiments.

**Figure S5. Requirement of Pols  $\eta$ ,  $\iota$ , and  $\kappa$  for the accumulation of Rev1 into replication foci in UV damaged human fibroblasts.** (A) Reduction of Rev1 foci in wild type cells treated with Pol $\eta$  siRNA and UV irradiated at 20 J/m<sup>2</sup>. (B) Quantification of UV induced Rev1 foci in wild type cells treated with control (NC) siRNA, Pol $\eta$  siRNA, or Rev7 siRNA. (C) UV induced assembly of Rev1 into replication foci is abrogated in XPV cells upon siRNA depletion of both Pol $\iota$  and Pol $\kappa$ .

**Figure S6. Requirement of Rad18 for the accumulation of TLS Pols into replication foci in UV damaged human fibroblasts.** (A) Rad18 siRNA knock down efficiency in normal human fibroblasts (MRC5). (B) Reduction of Pol $\eta$  and Rev1 foci in MRC5 fibroblasts treated with Rad18 siRNA and UV irradiated at 20 J/m<sup>2</sup>. (C) Quantification of UV induced GFP-Pol $\eta$ , GFP-Pol $\kappa$ , GFP-Rev1, and GFP-Rev7 foci in MRC5 fibroblasts treated with control (NC) or Rad18 siRNA.

**Figure S7. Plasmid system for analyzing TLS opposite DNA lesions in a gapped plasmid.** Two plasmids, one [pGAP-(6-4)PP] carrying the DNA lesion (T<sup>^</sup>T) opposite a gap of 11 nts and the other (pGAP-ND) with a gap in undamaged DNA are co-transfected in pre-siRNA treated normal human fibroblast (HF) cells. After transfection, the plasmid DNA is isolated from cells and transformed into XL-1 blue *E. coli* cells. Transformed *E. coli* cells are grown on LB/zeocin and LB/ampicillin plates. Gap filling frequency is determined by the ratio of Amp<sup>R</sup>/Zeo<sup>R</sup> colonies. The (6-4) TT photoproduct (Supplemental Table S6) or the *cis-syn* TT dimer (Supplemental Table S7) were present in the same sequence context as reported previously (Yoon et al., 2009, Proc. Natl. Acad. Sci., USA 106:18219; Yoon et al., 2010, Genes Dev 24:123).



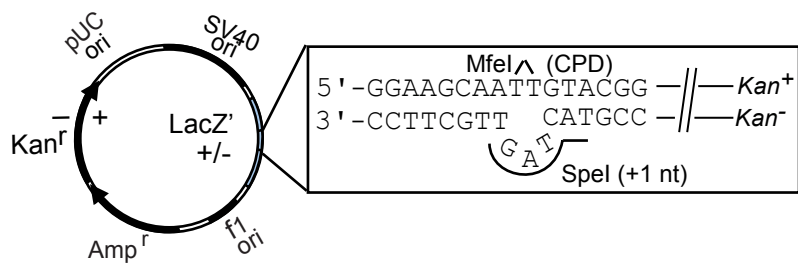

Figure S1

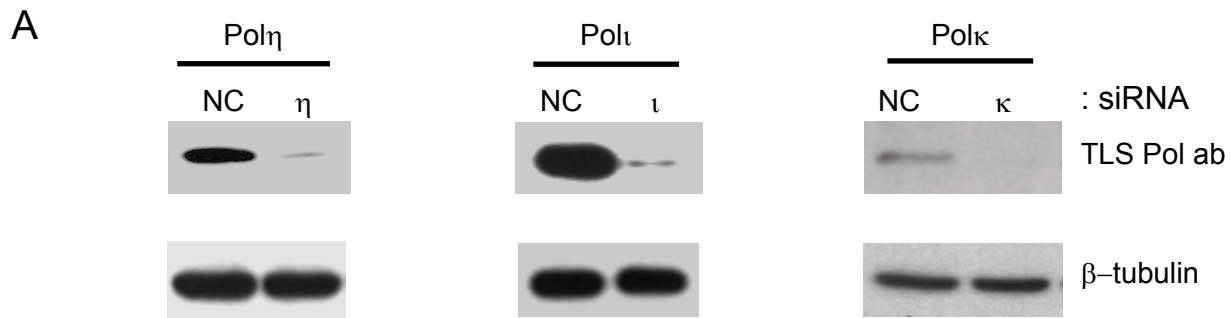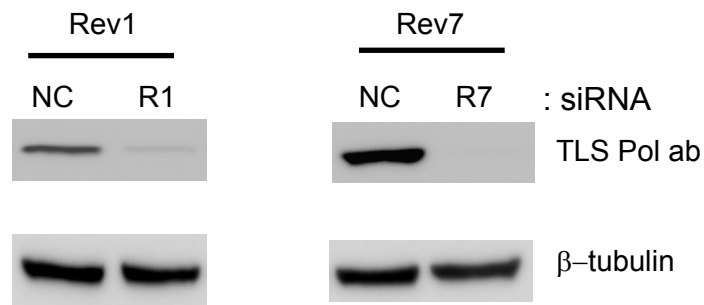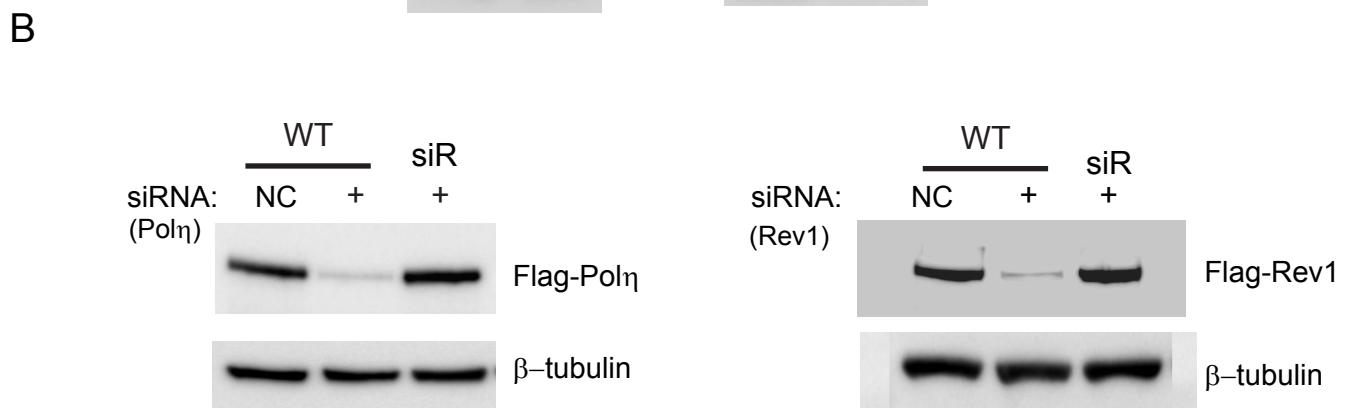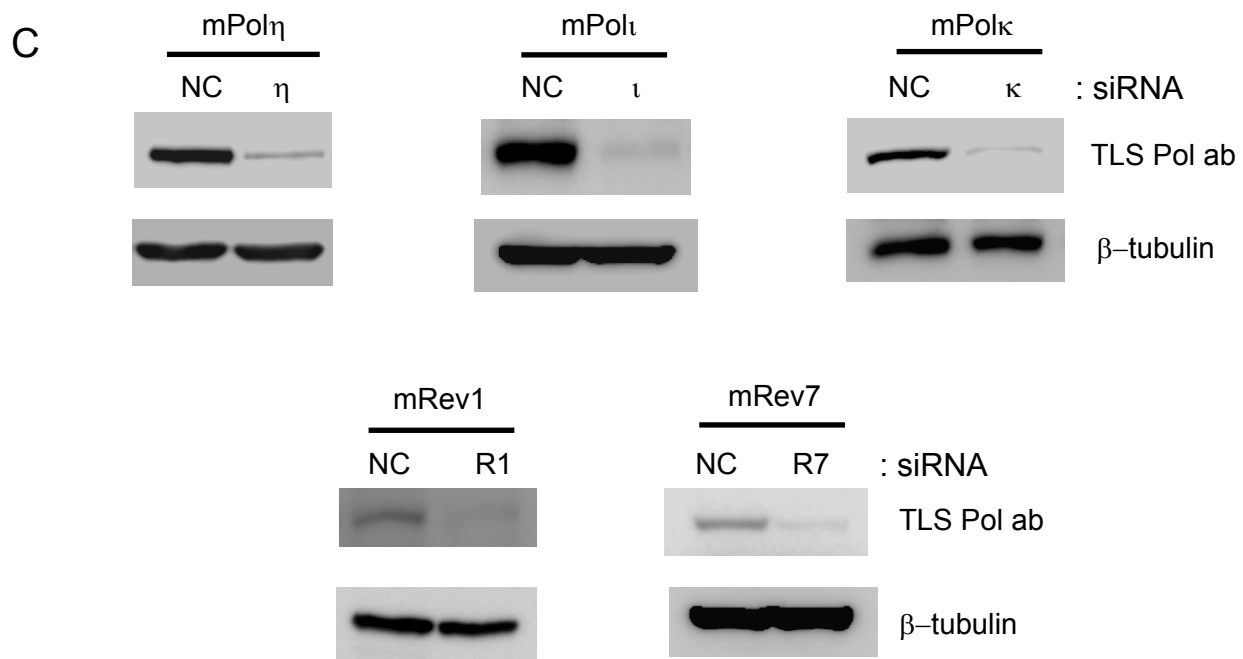

Figure S2

A

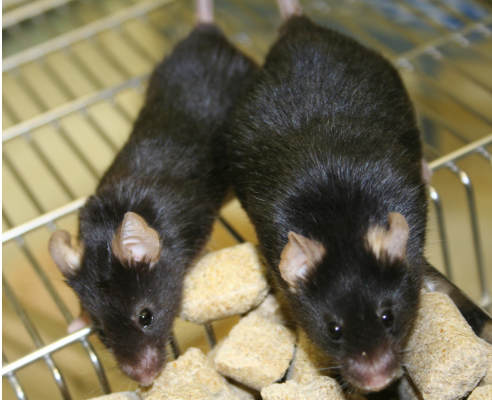

B

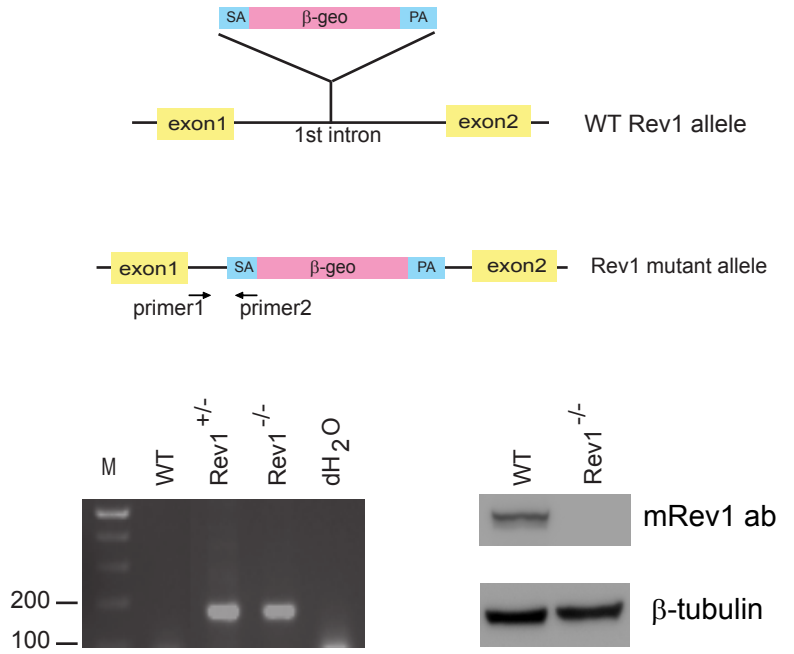

C

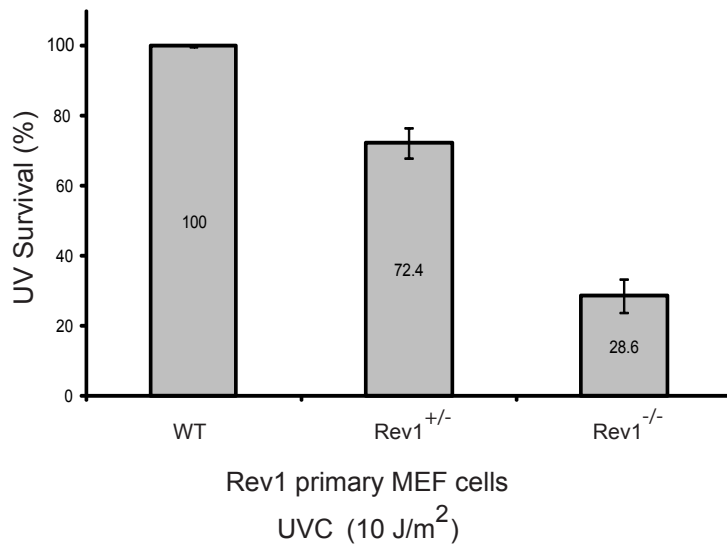

Figure S3

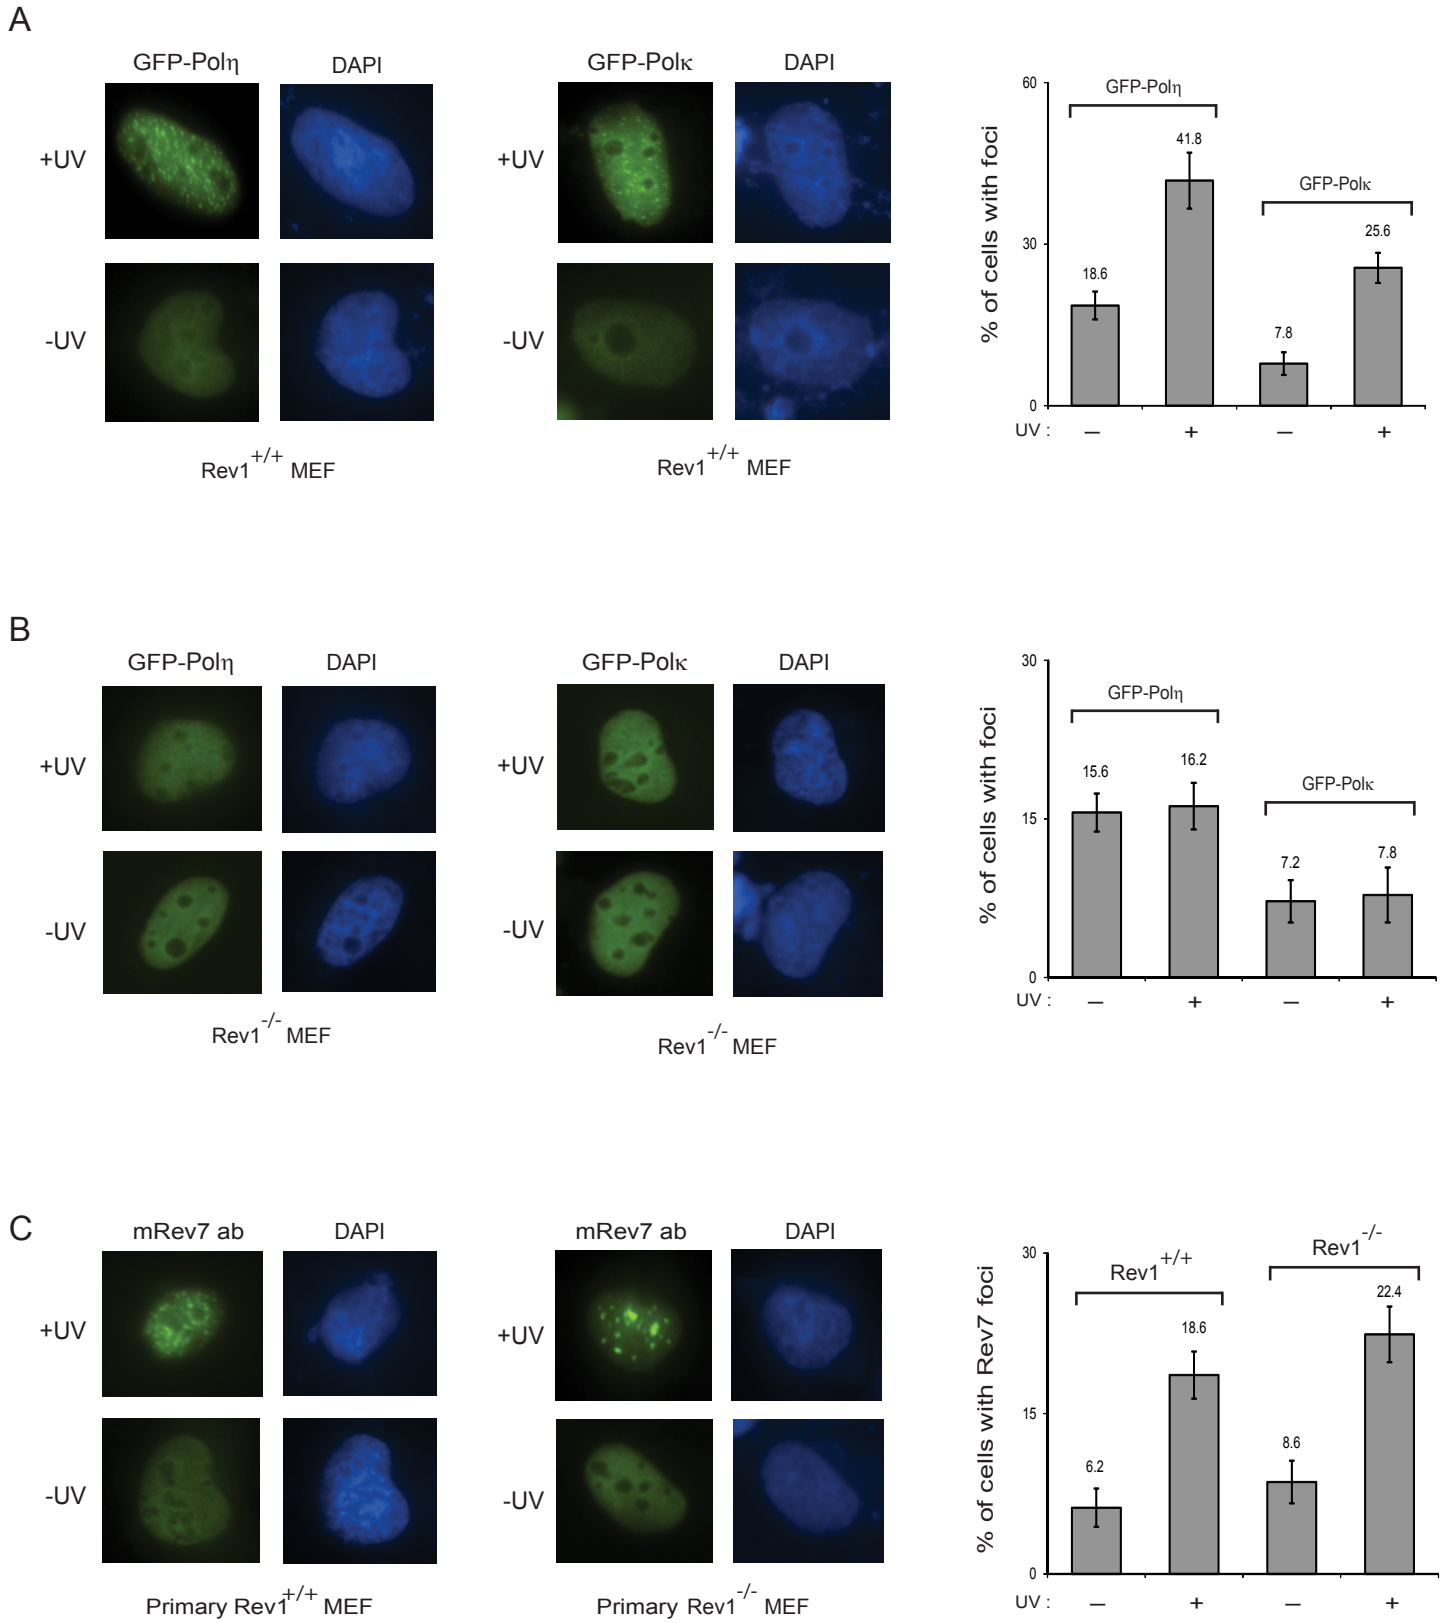

Figure S4

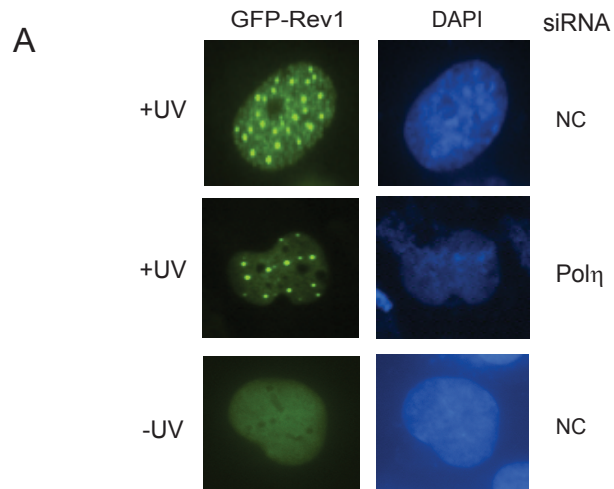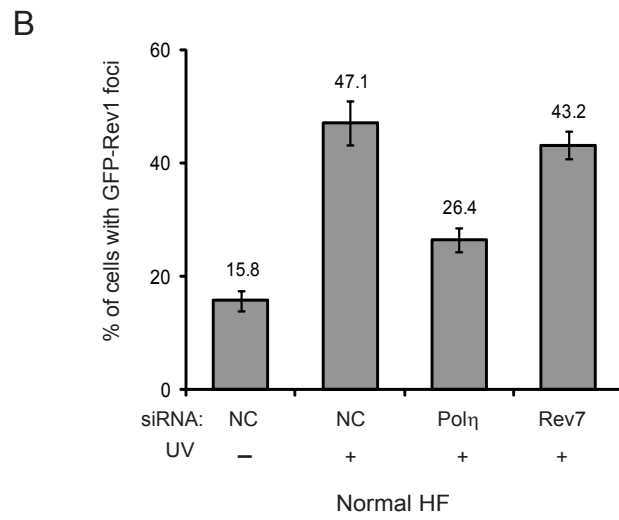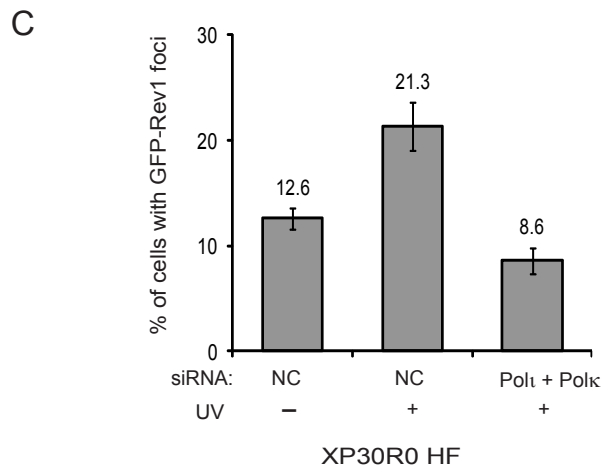

Figure S5

A

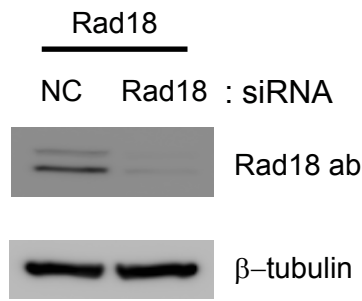

B

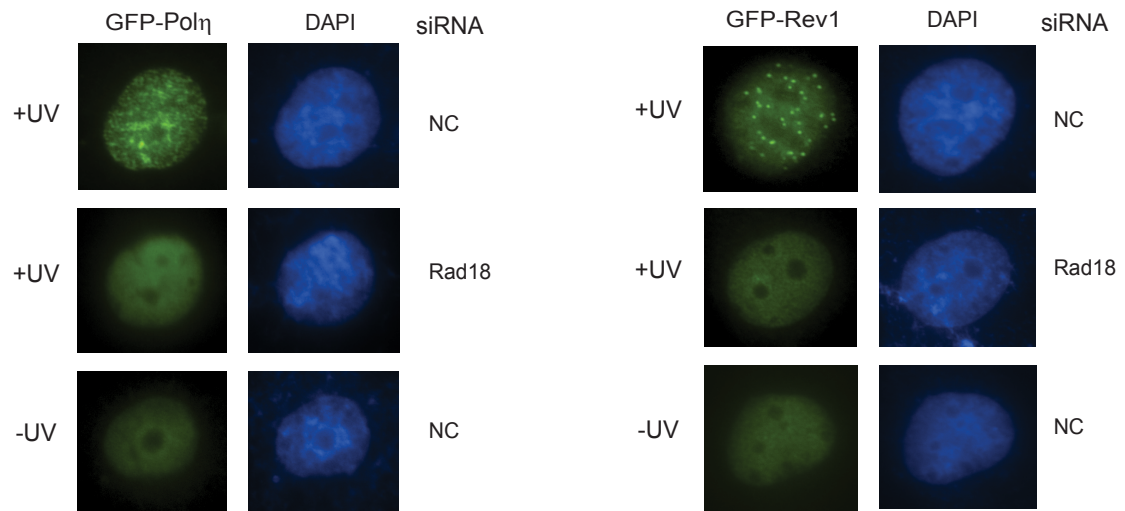

C

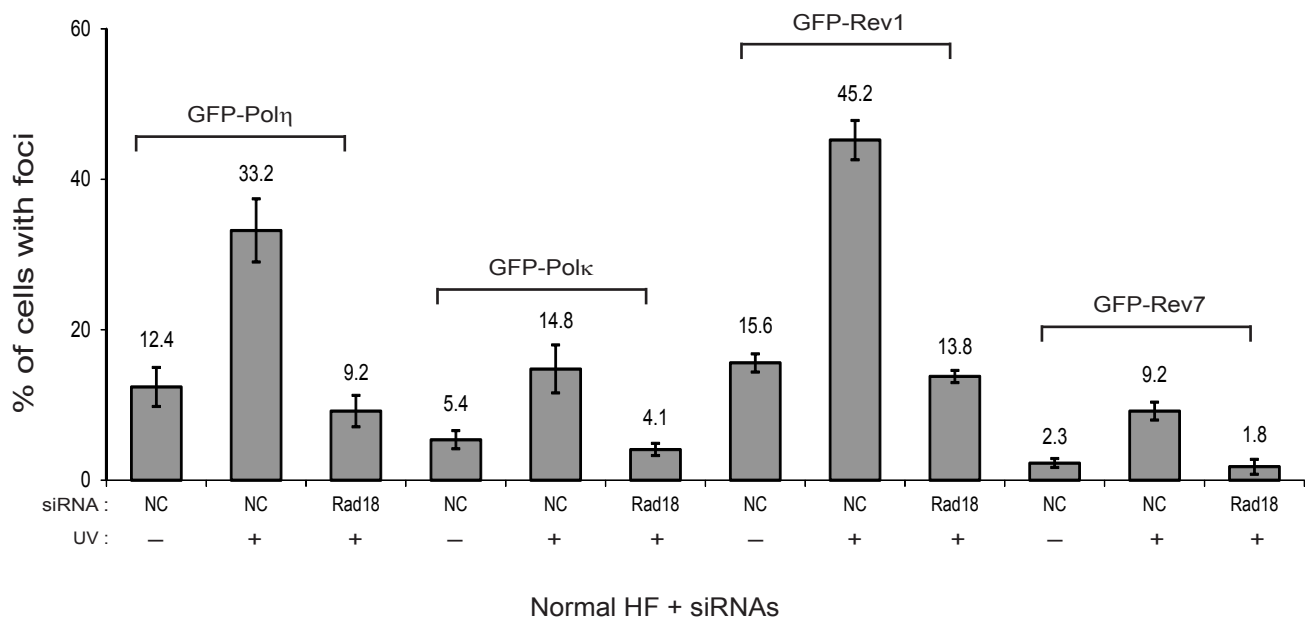

Figure S6

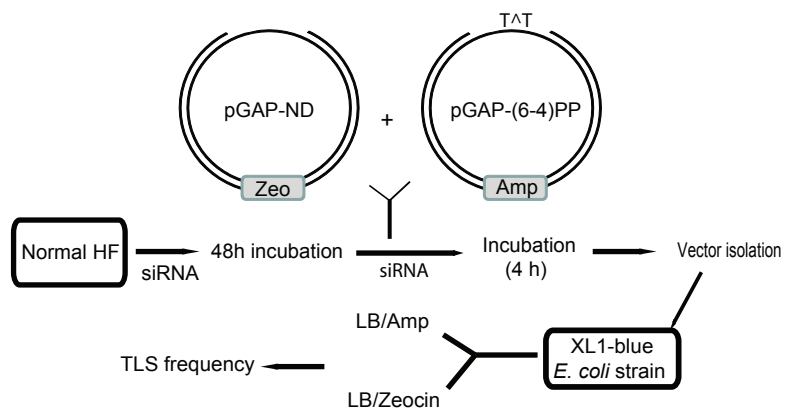

FIGURE S7
